# Supplementary material for: Conductive Iron Oxides Promote Methanogenic Acetate Degradation by Microbial Communities in a High-Temperature Petroleum Reservoir
Source: PubMed Central journal article supplement (PMC6440731; doi:10.1264/jsme2.me18140), 2019-02-15
Supplement: 34_95_s1.pdf [file 34_95_s1.pdf]

Table S1. The bacterial phylotypes detected in the enrichment cultures.

| Phylogenetic group  | Phylotype | Closest relative (Similarity, %)                                    | Number of clones |      |          |
|---------------------|-----------|---------------------------------------------------------------------|------------------|------|----------|
|                     |           |                                                                     | Non-Fe           | +Mag | +Fer+BES |
| Deltaproteobacteria | WD01      | AF385080 <i>Desulfacinum subterraneum</i> (99)                      |                  |      | 14       |
|                     | WD02      | AF385080 <i>Desulfacinum subterraneum</i> (89)                      |                  |      | 1        |
| Firmicutes          | WD03      | NR_043042 <i>Thermincola ferriacetica</i> strain Z-0001 (99)        |                  |      | 7        |
|                     | WD04      | NR_115129 <i>Desulfotomaculum kuznetsovii</i> strain 17 (84)        |                  |      | 2        |
|                     | WD05      | EU652084 <i>Thermaerobacter subterraneus</i> strain mt-14 (89)      | 1                |      |          |
| Thermotogae         | WD06      | NR_025466 <i>Petrotoga sibirica</i> strain SL25 (99)                | 2                | 14   | 3        |
|                     | WD07      | AP014508 <i>Thermotoga hypogea</i> NBRC 106472 (97)                 |                  |      | 4        |
|                     | WD08      | DQ374393 <i>Thermotoga elfii</i> strain G1 (97)                     | 2                | 2    |          |
|                     | WD09      | NR_025389 <i>Thermosipho geolei</i> strain DSM 13256 (98)           | 1                |      |          |
|                     | WD10      | NR_025466 <i>Petrotoga sibirica</i> strain SL25 (99)                |                  | 1    |          |
| Synergistetes       | WD11      | NR_036784 <i>Anaerobaculum thermoterrenum</i> strain RWcit 16S (99) | 35               | 5    | 7        |
|                     | WD12      | NR_074606 <i>Thermovirga lienii</i> strain DSM 17291 (89)           |                  |      | 1        |
| Deferribacteres     | WD13      | LC155975 <i>Petrothermobacter organivorans</i> strain ANA (99)      | 1                | 19   | 2        |
| Total clone numbers |           |                                                                     | 42               | 41   | 41       |

Table S2. The archaeal phylotypes detected in the enrichment cultures.

| Phylogenetic group  | Phylotype | Closest relative (Similarity, %)                          | Number of clones |      |          |
|---------------------|-----------|-----------------------------------------------------------|------------------|------|----------|
|                     |           |                                                           | Non-Fe           | +Mag | +Fer+BES |
| Euryarchaeota       | WD14      | NR_074214 <i>Methanosaeta thermophila</i> strain PT (100) | 29               | 24   | -*       |
| Total clone numbers |           |                                                           | 29               | 24   | -        |

\* Not analyzed because no PCR amplification was observed.
